# Supplementary material for: The GARP complex prevents sterol accumulation at the trans-Golgi network during dendrite remodeling
Source: PubMed Central journal article supplement (PMC9577387; doi:10.1083/jcb.202112108), 2022-10-14

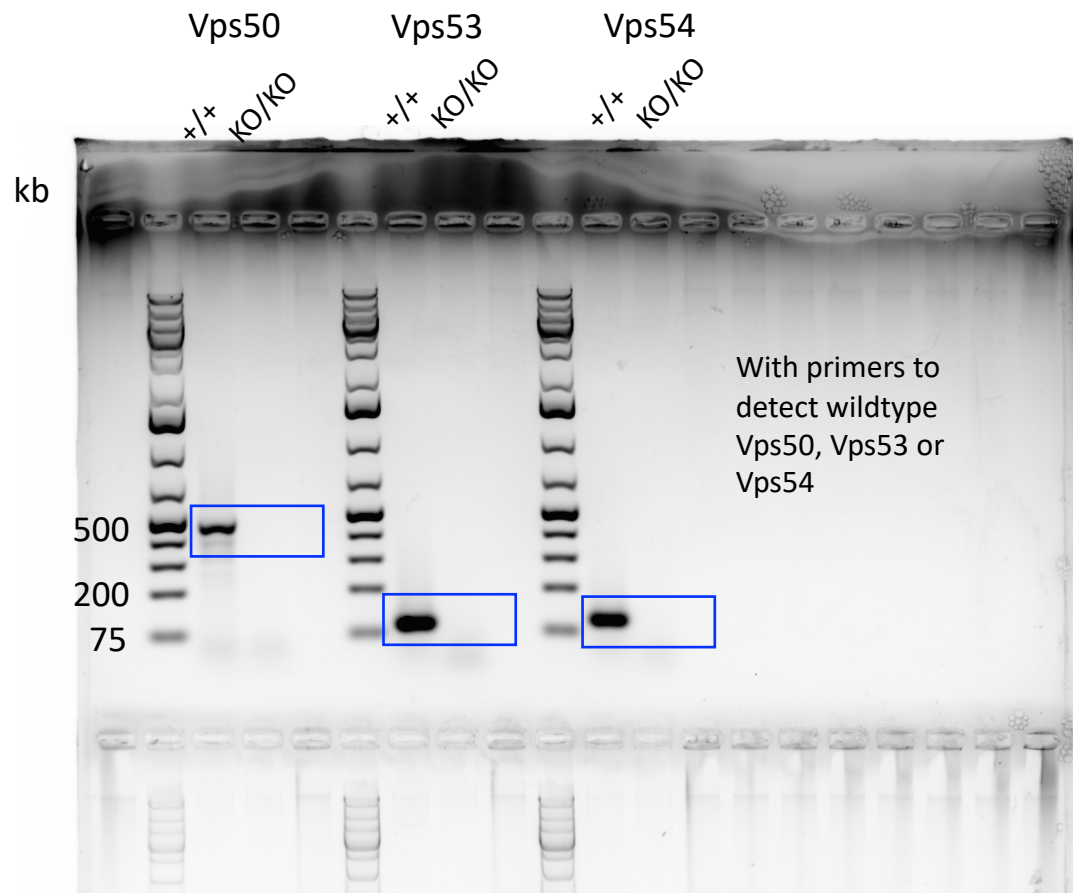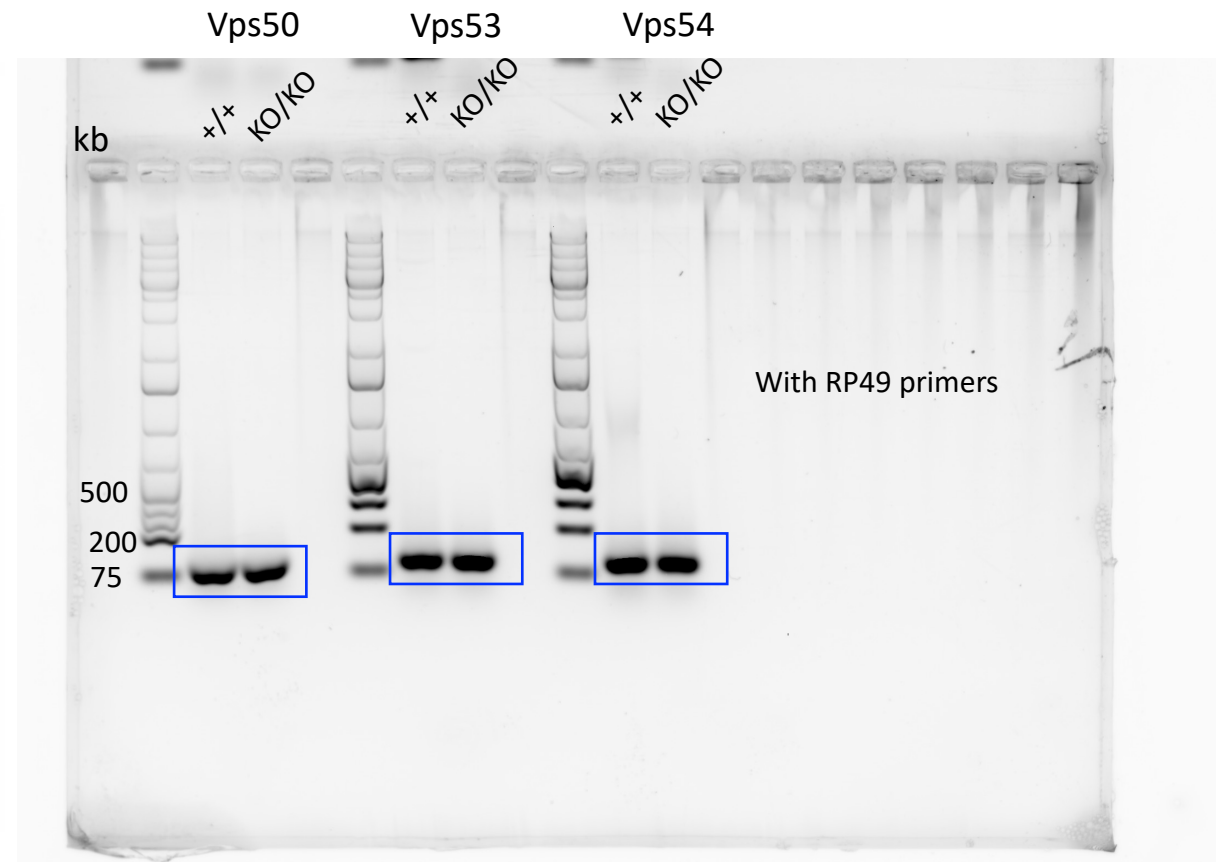

Supplement: JCB_202112108_SourceDataF1.pdf [file JCB_202112108_SourceDataF1.pdf]
