# Supplementary material for: The GARP complex prevents sterol accumulation at the trans-Golgi network during dendrite remodeling
Source: PubMed Central journal article supplement (PMC9577387; doi:10.1083/jcb.202112108), 2022-10-14
Supplement: JCB_202112108_SourceDataFS1.pdf [file JCB_202112108_SourceDataFS1.pdf]

Vps50

WT  
primers

KO  
primers

+/+ KO/KO

+/+ KO/KO

kb

500  
200  
75

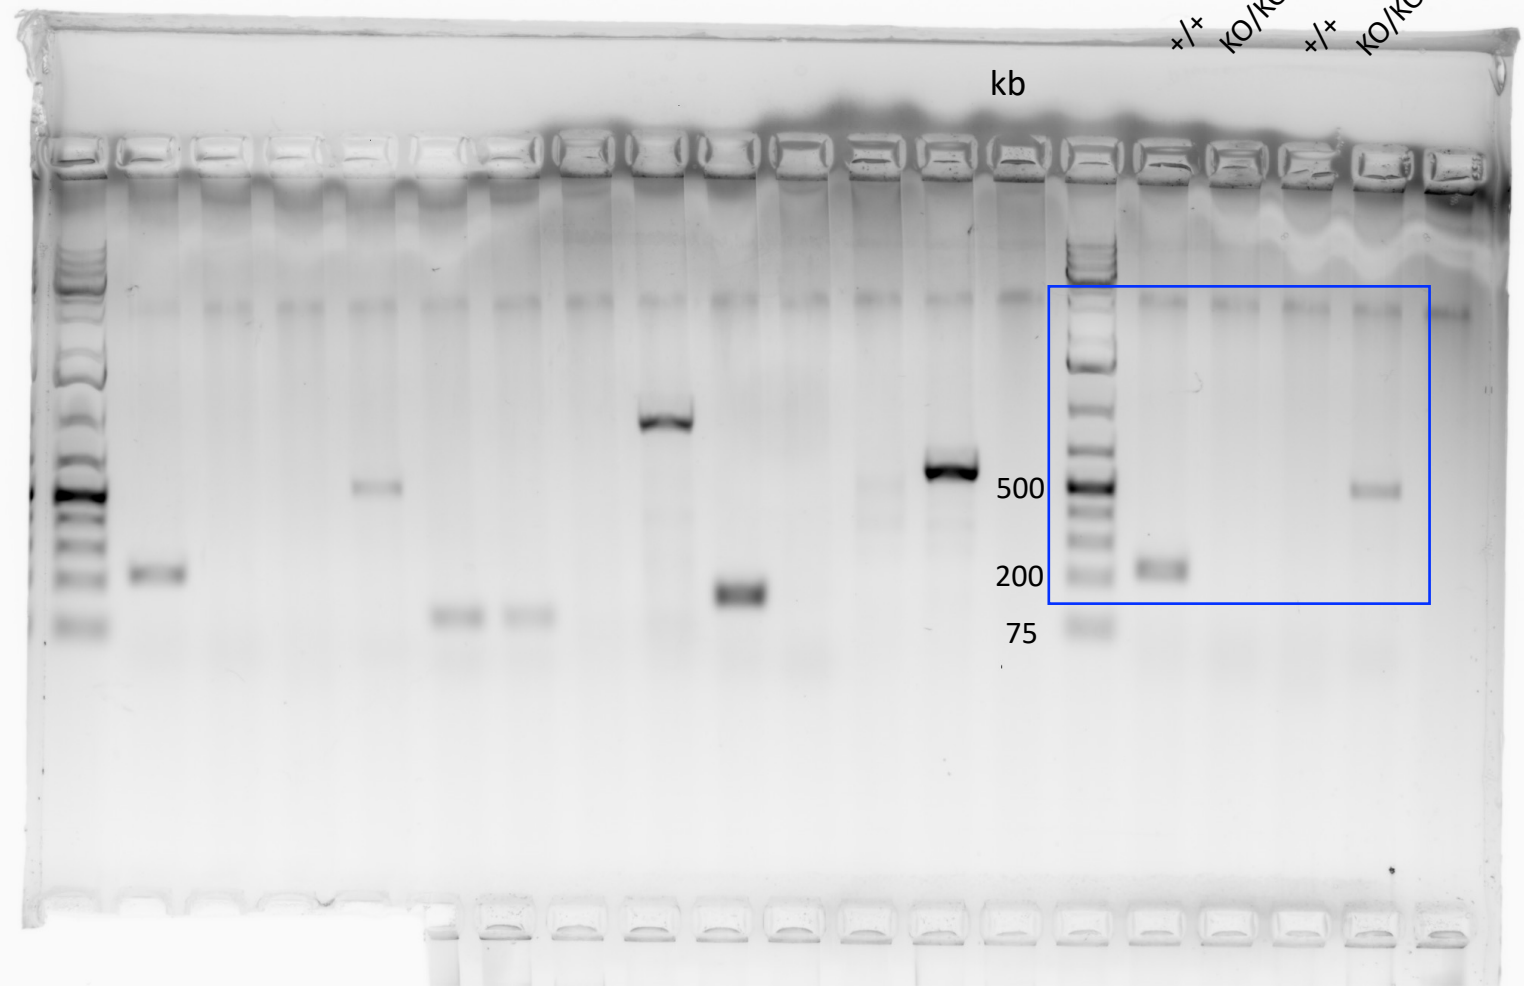

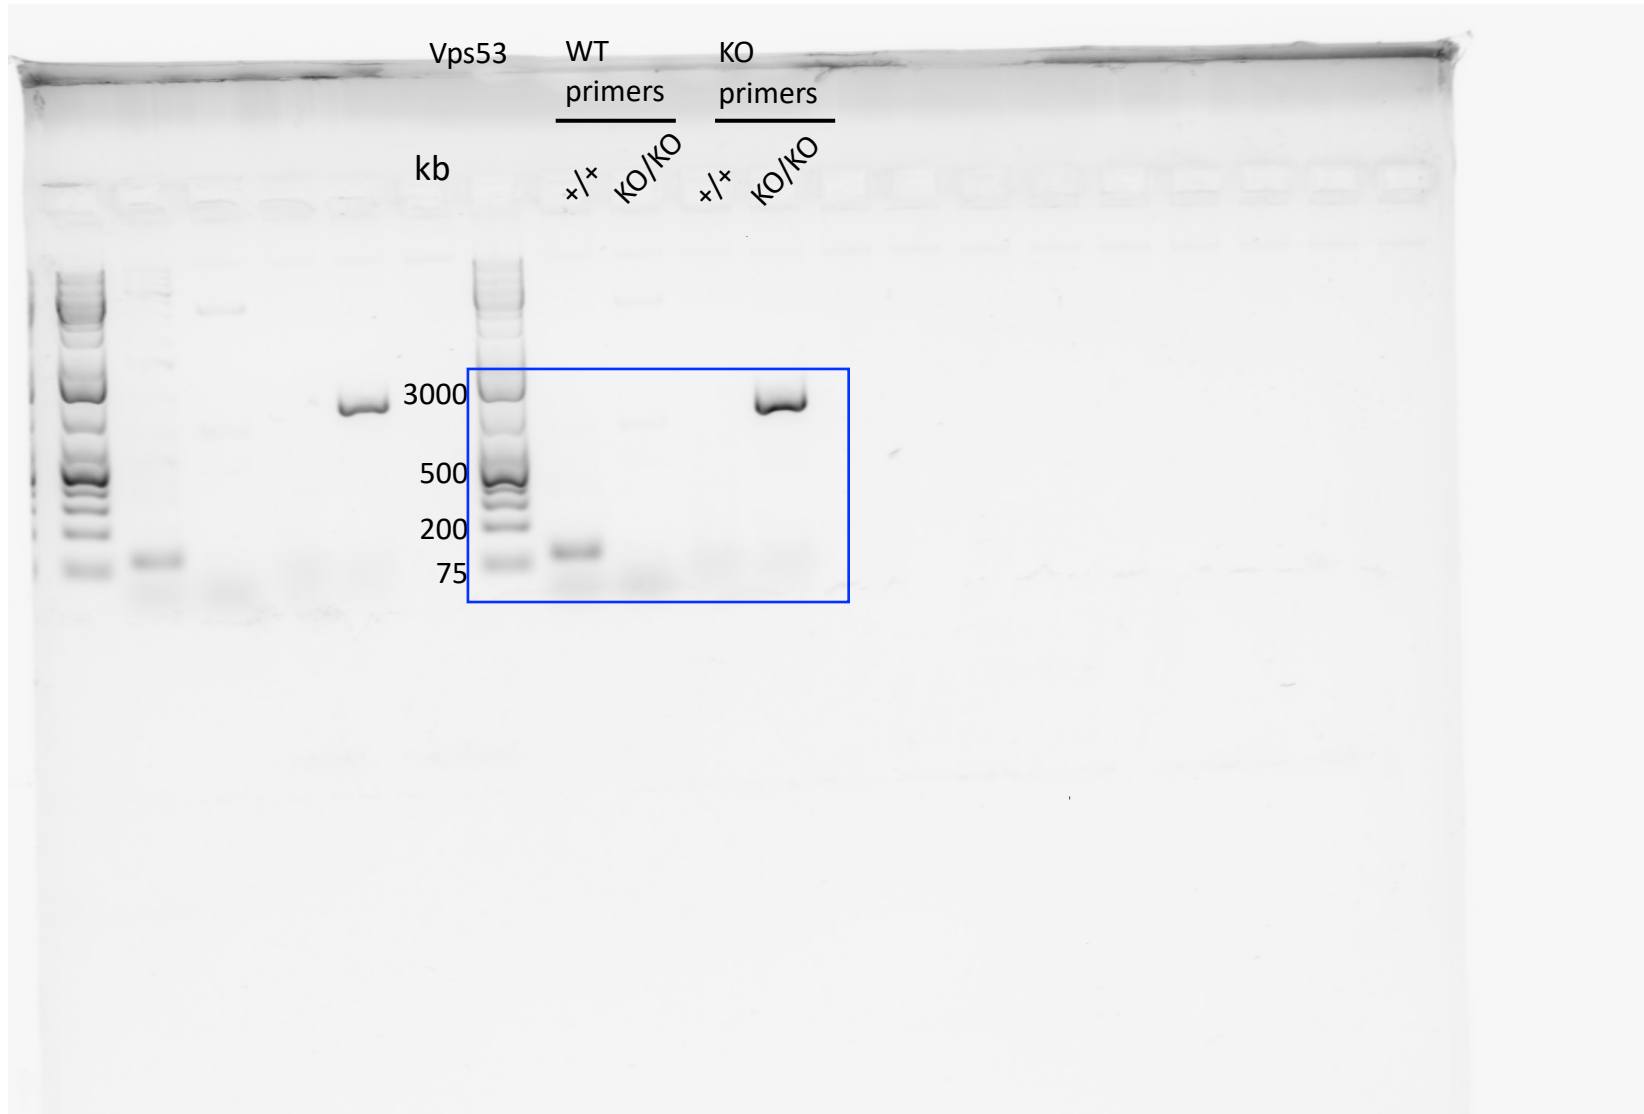

Vps54

| WT primers |       | KO primers |       |
|------------|-------|------------|-------|
| +/+        | KO/KO | +/+        | KO/KO |

kb

500

200

75

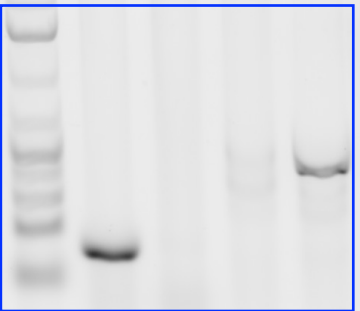

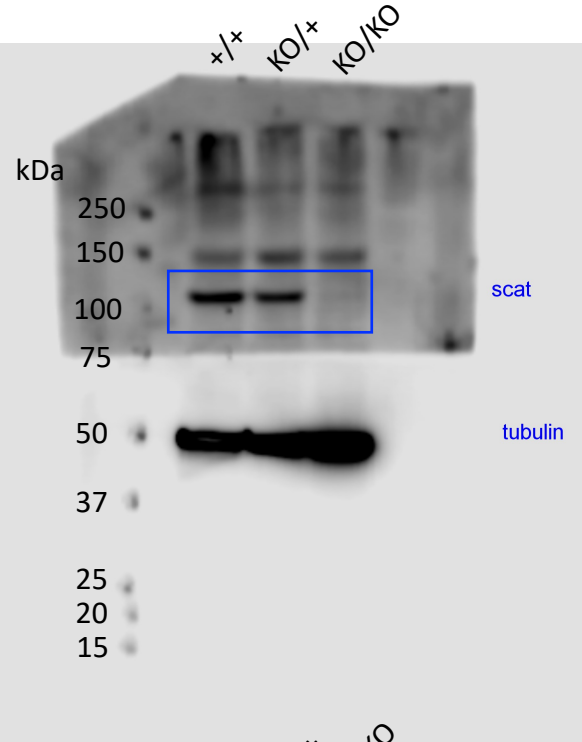

Membrane was cut at ~75kDa and the top was probed with anti-*scat* antibody, the bottom was probed with anti-tubulin antibody.

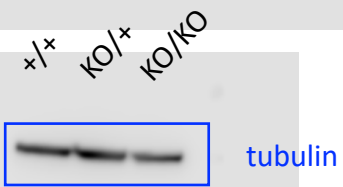

Because the original tubulin signal was so strong, we stripped the blot, incubated with a more diluted anti-tubulin solution and obtained a lighter exposure.
